# Supplementary material for: Sodium and Potassium Intakes and Cardiovascular Risk Profiles in Childhood Cancer Survivors: The SCCSS-Nutrition Study
Source: Preprints.org preprint supplement (doi:10.20944/preprints201910.0185.v1), 2019-10-16
Supplement: Supplementary file [file supplementary]

## Supplementary material

**Supplementary Table S1.** Scoring method and mean scores (95%CI) of components of the modified Alternate Healthy Eating Index<sup>1,2</sup> of adult childhood cancer survivors (CCSs) who filled in the food frequency questionnaire by sex

| Components                                                           | Criteria for minimum score (0) | Criteria for maximum score (10) | Score in CCSs <sup>13</sup> mean (95%CI) |                          |
|----------------------------------------------------------------------|--------------------------------|---------------------------------|------------------------------------------|--------------------------|
|                                                                      |                                |                                 | male (n=401)                             | female (n=401)           |
| Vegetables, excluding potatoes (servings/day) <sup>3</sup>           | 0                              | ≥ 5                             | 4.6 (4.4; 4.9)                           | 5.5 (5.3; 5.7)           |
| Fruit, excluding juice (servings/day) <sup>4</sup>                   | 0                              | ≥ 4                             | 2.9 (2.6; 3.2)                           | 3.9 (3.6; 4.2)           |
| Whole grains (g/day) <sup>5</sup>                                    |                                |                                 |                                          |                          |
| Males                                                                | 0                              | ≥ 90                            | 3.3 (3.0; 3.7)                           |                          |
| Females                                                              | 0                              | ≥ 75                            |                                          | 4.6 (4.3; 5.0)           |
| Sugar-sweetened beverage and fruit juice (servings/day) <sup>6</sup> | ≥ 1                            | 0                               | 3.8 (3.5; 4.2)                           | 5.0 (4.6; 5.3)           |
| Nuts, seeds, legumes, and tofu (servings/day) <sup>7</sup>           | 0                              | ≥ 1                             | 1.9 (1.6; 2.2)                           | 2.5 (2.2; 2.8)           |
| Red and processed meat (servings/day) <sup>8</sup>                   | ≥ 1.5                          | 0                               | 3.5 (3.2; 3.8)                           | 5.7 (5.4; 6.0)           |
| Trans fat (% of total energy intake) <sup>9</sup>                    | ≥ 4                            | ≤ 0.5                           | 9.4 (9.4; 9.4)                           | 9.4 (9.3; 9.4)           |
| Fish, excluding processed products (g/day)                           | 0                              | ≥ 32.4                          | 5.2 (4.8; 5.6)                           | 5.0 (4.6; 5.3)           |
| PUFA (% of total energy intake) <sup>10</sup>                        | ≤ 2                            | ≥ 10                            | 4.8 (4.6; 5.1)                           | 5.1 (4.8; 5.3)           |
| Sodium <sup>11</sup> , mg/day                                        | Highest decile                 | Lowest decile                   | 5.3 (5.0; 5.6)                           | 5.3 (5.0; 5.6)           |
| Alcohol (drinks/day) <sup>12</sup>                                   |                                |                                 |                                          |                          |
| Males                                                                | ≥ 3.5                          | 0.5 - 2.0                       | 5.4 (5.0; 5.7)                           |                          |
| Females                                                              | ≥ 2.5                          | 0.5 - 1.5                       |                                          | 4.0 (3.7; 4.3)           |
| <b>Total</b>                                                         | <b>0</b>                       | <b>100</b>                      | <b>50.3 (49.1; 51.5)</b>                 | <b>56.0 (54.8; 57.2)</b> |

CCSs, childhood cancer survivors; CI, confidence interval, ICCC-3, International Childhood Cancer Classification, 3<sup>rd</sup> edition; PUFA, polyunsaturated fatty acids

<sup>1</sup> Adapted from Chiuve et al. J Nutr 2012 142(6):1009-18.

<sup>2</sup> Intermediate food intake was scored proportionately between the minimum score 0 and the maximum score 10.

<sup>3</sup> One serving was equal to 118.3 g of raw or cooked vegetables or 250 g of vegetable soup. Dried vegetables were not included.

<sup>4</sup> One serving was equal to 118.3 g of raw or cooked fruit. Dried fruit was not included.

<sup>5</sup> Whole grain products like whole grain bread and muesli were included.

<sup>6</sup> One serving was equal to 226.8 g.

<sup>7</sup> One serving was equal to 28.4 g.

<sup>8</sup> One serving was equal to 113.4 g of red meat or 42.5 g of processed meat.

<sup>9</sup> Consumption was estimated based on the assumption that each food contains a maximum of 2 g of trans fat per 100 g of total fat, as defined in Swiss regulation.

<sup>10</sup> The highest score was given to individuals with ≥10% of total energy intake from PUFA.

<sup>11</sup> Values in lowest decile were ≤1084 mg/d of sodium in females and ≤1168 mg/d in males and in highest decile were ≥2802 mg/d in females and ≥2969 mg/d in males.

<sup>12</sup> One drink was 113.4 g of wine, 340.2 g of beer or 42.5 g of liquor. A score of 2.5 was given to nondrinkers.

<sup>13</sup> Adjusted for age at survey and ICCC-3 diagnosis.

**Supplementary Table S2.** Sociodemographic and lifestyle characteristics of adult childhood cancer survivors by participants and nonparticipants to the SCCSS-Nutrition study

| Characteristics <i>n</i> (%)                                 | FFQ                               |                                                        |                              | Morning fasting spot urine        |                                                        |                              |
|--------------------------------------------------------------|-----------------------------------|--------------------------------------------------------|------------------------------|-----------------------------------|--------------------------------------------------------|------------------------------|
|                                                              | Participants<br>( <i>n</i> = 802) | Non-<br>participants <sup>1</sup><br>( <i>n</i> = 797) | <i>p</i> -value <sup>2</sup> | Participants<br>( <i>n</i> = 111) | Non-<br>participants <sup>3</sup><br>( <i>n</i> = 110) | <i>p</i> -value <sup>2</sup> |
| <b>Sex</b>                                                   |                                   |                                                        |                              |                                   |                                                        |                              |
| Females                                                      | 401 (50)                          | 354 (44)                                               | <b>0.025</b>                 | 62 (56)                           | 57 (52)                                                | <b>0.547</b>                 |
| Males                                                        | 401 (50)                          | 443 (56)                                               |                              | 49 (44)                           | 53 (48)                                                |                              |
| <b>Age at follow-up survey<sup>4</sup>,<br/>median (IQR)</b> | 34.6 (28.8; 41.1)                 | 32.0 (27.1; 38.7)                                      | <b>0.520</b>                 | 39.1 (30.7; 45.2)                 | 33.4 (26.9; 40.4)                                      | <b>0.290</b>                 |
| ≤30 y                                                        | 248 (31)                          | 328 (41) <sup>d</sup>                                  | <b>&lt;0.001</b>             | 26 (23)                           | 44 (40)                                                | <b>0.010</b>                 |
| 31-39 y                                                      | 320 (40)                          | 305 (38)                                               |                              | 37 (33)                           | 37 (34)                                                |                              |
| ≥40 y                                                        | 234 (29)                          | 164 (21)                                               |                              | 48 (43)                           | 29 (26)                                                |                              |
| <b>Country of birth</b>                                      |                                   |                                                        |                              |                                   |                                                        |                              |
| Switzerland                                                  | 763 (95)                          | 737 (92)                                               | <b>0.027</b>                 | 101 (91)                          | 98 (89)                                                | <b>0.637</b>                 |
| Other                                                        | 39 (5)                            | 60 (8)                                                 |                              | 10 (9)                            | 12 (11)                                                |                              |
| <b>Language region within<br/>Switzerland</b>                |                                   |                                                        |                              |                                   |                                                        |                              |
| German speaking                                              | 570 (71)                          | 581 (73)                                               | <b>0.548</b>                 | -                                 | -                                                      | <b>NA</b>                    |
| French speaking                                              | 214 (27)                          | 195 (24)                                               |                              | 111 (100)                         | 110 (100)                                              |                              |
| Italian speaking                                             | 18 (2)                            | 21 (3)                                                 |                              | -                                 | -                                                      |                              |
| <b>Education (highest degree)<sup>5</sup></b>                |                                   |                                                        |                              |                                   |                                                        |                              |
| Lower than university                                        | 686 (86)                          | 699 (88)                                               | <b>0.203</b>                 | 69 (62)                           | 71 (65)                                                | <b>0.713</b>                 |
| University                                                   | 116 (14)                          | 98 (12)                                                |                              | 42 (38)                           | 39 (35)                                                |                              |
| <b>Living situation<sup>5</sup></b>                          |                                   |                                                        |                              |                                   |                                                        |                              |
| Alone                                                        | 131 (16)                          | 129 (16)                                               | <b>0.936</b>                 | 19 (17)                           | 24 (22)                                                | <b>0.377</b>                 |
| With others                                                  | 671 (84)                          | 668 (84)                                               |                              | 92 (83)                           | 86 (78)                                                |                              |
| <b>Physical activity<sup>5,6</sup></b>                       |                                   |                                                        |                              |                                   |                                                        |                              |
| Inactive                                                     | 157 (20)                          | 204 (26)                                               | <b>0.004</b>                 | 32 (29)                           | 32 (29)                                                | <b>0.966</b>                 |
| Active                                                       | 645 (80)                          | 593 (74)                                               |                              | 79 (72)                           | 78 (71)                                                |                              |
| <b>Smoking status<sup>5</sup></b>                            |                                   |                                                        |                              |                                   |                                                        |                              |
| Current                                                      | 151 (19)                          | 207 (26)                                               | <b>0.002</b>                 | 25 (23)                           | 21 (19)                                                | <b>0.261</b>                 |
| Former                                                       | 97 (12)                           | 79 (10)                                                |                              | 15 (14)                           | 24 (22)                                                |                              |
| Never                                                        | 554 (69)                          | 511 (64)                                               |                              | 71 (64)                           | 65 (59)                                                |                              |
| <b>BMI at baseline survey<sup>5</sup></b>                    |                                   |                                                        |                              |                                   |                                                        |                              |
| Obese, ≥30 kg/m <sup>2</sup>                                 | 46 (6)                            | 59 (7)                                                 | <b>0.548</b>                 | 10 (9)                            | 14 (13)                                                | <b>0.134</b>                 |
| Overweight, ≥25 to <30 kg/m <sup>2</sup>                     | 146 (18)                          | 141 (18)                                               |                              | 15 (14)                           | 25 (23)                                                |                              |
| Normal, ≥18.5 to <25 kg/m <sup>2</sup>                       | 546 (68)                          | 540 (68)                                               |                              | 79 (71)                           | 68 (62)                                                |                              |
| Underweight, <18.5 kg/m <sup>2</sup>                         | 64 (8)                            | 57 (7)                                                 |                              | 7 (6)                             | 3 (3)                                                  |                              |

BMI, body mass index; CCSs, childhood cancer survivors; FFQ, food frequency questionnaire; IQR, interquartile range; NA, not applicable; SCCSS, Swiss Childhood Cancer Survivor Study

<sup>1</sup> This includes 635 CCSs who did not respond, 45 who refused, 11 who were pregnant or breastfeeding, 35 with missing dietary data, and 71 with unreliable dietary data.

<sup>2</sup> *p*-value calculated from chi-square statistics (categorical, 2-sided test) or Kruskal-Wallis test (continuous, nonparametric) to compare differences between participants to nonparticipants.

<sup>3</sup> This includes 9 CCSs with no valid address available anymore or being abroad, 15 who refused, and 86 who did not respond.

<sup>4</sup> Age at follow-up survey is calculated for FFQ nonparticipants by taken the average participants' date of filling in the questionnaire.

<sup>5</sup> Based on information from the SCCSS baseline questionnaire filled in between 2007-2013.

<sup>6</sup> Active: ≥150 minutes of moderate intense or 75 minutes of vigorous intense or a combination of moderate and vigorous intense physical activity per week.

**Supplementary Table S3.** Clinical characteristics of adult childhood cancer survivors by participants and nonparticipants to the SCCSS-Nutrition study

| Characteristics, <i>n</i> (%)                    | FFQ                               |                                                        |                              | Morning fasting spot urine        |                                                        |                              |
|--------------------------------------------------|-----------------------------------|--------------------------------------------------------|------------------------------|-----------------------------------|--------------------------------------------------------|------------------------------|
|                                                  | Participants<br>( <i>n</i> = 802) | Non-<br>participants <sup>1</sup><br>( <i>n</i> = 797) | <i>p</i> -value <sup>2</sup> | Participants<br>( <i>n</i> = 111) | Non-<br>participants <sup>3</sup><br>( <i>n</i> = 110) | <i>p</i> -value <sup>2</sup> |
| <b>ICCC-3 diagnosis</b>                          |                                   |                                                        |                              |                                   |                                                        |                              |
| I: Leukemia                                      | 246 (31)                          | 264 (33)                                               | <b>&lt;0.001</b>             | 30 (27)                           | 27 (25)                                                | <b>0.607</b>                 |
| II: Lymphoma                                     | 173 (22)                          | 139 (17)                                               |                              | 30 (27)                           | 30 (27)                                                |                              |
| III: CNS tumor                                   | 81 (10)                           | 140 (18)                                               |                              | 9 (8)                             | 17 (15)                                                |                              |
| IV: Neuroblastoma                                | 28 (3)                            | 31 (4)                                                 |                              | 4 (4)                             | 3 (3)                                                  |                              |
| V: Retinoblastoma                                | 12 (2)                            | 22 (3)                                                 |                              | 2 (2)                             | 3 (3)                                                  |                              |
| VI: Renal tumor                                  | 52 (6)                            | 41 (5)                                                 |                              | 4 (4)                             | 3 (3)                                                  |                              |
| VII: Hepatic tumor                               | 6 (<1)                            | 3 (<1)                                                 |                              | 1 (<1)                            | 1 (<1)                                                 |                              |
| VIII: Bone tumor                                 | 50 (6)                            | 29 (4)                                                 |                              | 11 (10)                           | 5 (5)                                                  |                              |
| IX: Soft tissue sarcoma                          | 66 (8)                            | 32 (4)                                                 |                              | 7 (6)                             | 10 (9)                                                 |                              |
| X: Germ cell tumor                               | 43 (5)                            | 42 (5)                                                 |                              | 8 (7)                             | 4 (4)                                                  |                              |
| XI & XII: Other tumor                            | 26 (3)                            | 17 (2)                                                 |                              | 4 (4)                             | 3 (3)                                                  |                              |
| Langerhans cell histiocytosis                    | 19 (2)                            | 37 (5)                                                 |                              | 1 (<1)                            | 4 (4)                                                  |                              |
| <b>Age at diagnosis</b> , <sup>4</sup> years     | 9.7 (3.9; 13.9)                   | 8.0 (3.8; 13.1)                                        | <b>0.010</b>                 | 11.5 (5.0; 15.6)                  | 10.7 (4.6; 15.8)                                       | <b>0.696</b>                 |
| <b>Time since diagnosis</b> , <sup>4</sup> years | 26.1 (20.2; 31.7)                 | 24.0 (19.5; 30.3)                                      | <b>0.186</b>                 | 28.3 (21.0; 32.7)                 | 22.8 (18.5; 30.1)                                      | <b>0.004</b>                 |
| <b>Any irradiation</b>                           | 292 (36)                          | 293 (37)                                               | <b>0.883</b>                 | 40 (36)                           | 37 (34)                                                | <b>0.708</b>                 |
| Chest irradiation                                | 87 (11)                           | 67 (8)                                                 | <b>0.098</b>                 | 15 (14)                           | 10 (9)                                                 | <b>0.299</b>                 |
| <30 Gy                                           | 31 (4)                            | 21 (3)                                                 | <b>0.218</b>                 | 3 (3)                             | 3 (3)                                                  | <b>0.498</b>                 |
| ≥30 Gy                                           | 56 (7)                            | 46 (6)                                                 |                              | 12 (11)                           | 7 (6)                                                  |                              |
| <b>Any chemotherapy</b>                          | 642 (80)                          | 606 (76)                                               | <b>0.052</b>                 | 80 (72)                           | 78 (71)                                                | <b>0.848</b>                 |
| Anthracyclines                                   | 298 (37)                          | 298 (37)                                               | <b>0.923</b>                 | 39 (35)                           | 26 (24)                                                | <b>0.061</b>                 |
| <b>HSCT</b>                                      | 30 (4)                            | 34 (4)                                                 | <b>0.592</b>                 | 5 (5)                             | 7 (6)                                                  | <b>0.542</b>                 |
| <b>History of relapse</b>                        | 99 (12)                           | 107 (13)                                               | <b>0.519</b>                 | 18 (16)                           | 15 (14)                                                | <b>0.591</b>                 |

CCSs, childhood cancer survivor; CNS, central nervous system; Gy, gray; HSCT, hematopoietic stem cell transplantation; ICCC-3, International Childhood Cancer Classification, 3<sup>rd</sup> edition; SCCSS, Swiss Childhood Cancer Survivor Study

<sup>1</sup> This includes 635 CCSs who did not respond, 45 who refused, 11 who were pregnant or breastfeeding, 35 with missing dietary data, and 71 with unreliable dietary data.

<sup>2</sup> *p*-value calculated from two-sample mean comparison test (t test) or chi-square statistics comparing participants excluded from analyses, nonparticipants, and non-eligible CCS to participants (2-sided test).

<sup>3</sup> This includes 9 CCSs with no valid address available anymore or being abroad, 15 who refused, and 86 who did not respond.

<sup>4</sup> Values are medians with interquartile ranges (IQRs).

**Supplementary Table S4.** Dietary intake based on self-reported food frequency questionnaire (FFQ) data of adult childhood cancer survivors by participants to the SCCSS-Nutrition study

|                                         | DACH recommendations <sup>1</sup> |           | FFQ participants (n = 802) |                     | FFQ but not spot urine participants n = 691 |                     | Spot urine participants (n = 111) |                     |
|-----------------------------------------|-----------------------------------|-----------|----------------------------|---------------------|---------------------------------------------|---------------------|-----------------------------------|---------------------|
|                                         | male                              | female    | mean ± SD                  | % DACH <sup>2</sup> | mean ± SD                                   | % DACH <sup>2</sup> | mean ± SD                         | % DACH <sup>2</sup> |
| Total energy, kcal <sup>3</sup>         | 2300-3400                         | 1800-2600 | 1639 ± 581                 | 65                  | 1654 ± 595                                  | 65                  | 1543 ± 481                        | 62                  |
| <b>Macronutrients</b>                   |                                   |           |                            |                     |                                             |                     |                                   |                     |
| Protein, g                              | 57                                | 48        | 66.0 ± 29.3                | 126                 | 67.0 ± 30.3                                 | 127                 | 60.1 ± 21.2                       | 116                 |
| % of energy <sup>4</sup>                | 10-20                             | 10-20     | 16.1 ± 3.6                 | 107                 | 16.2 ± 3.6                                  | 108                 | 15.7 ± 3.2                        | 105                 |
| Vegetal, g                              |                                   |           | 18.2 ± 7.6                 |                     | 18.2 ± 7.8                                  |                     | 17.7 ± 6.6                        |                     |
| Animal, g                               |                                   |           | 47.9 ± 26.6                |                     | 48.8 ± 27.6                                 |                     | 42.4 ± 19.1                       |                     |
| Carbohydrates, g <sup>5</sup>           | 225-275                           | 225-275   | 181 ± 74                   | 72                  | 182 ± 76                                    | 73                  | 175 ± 65                          | 70                  |
| % of energy <sup>4,5</sup>              | 45-55                             | 45-55     | 44.1 ± 8.9                 | 88                  | 44.0 ± 9.0                                  | 88                  | 45.1 ± 8.0                        | 90                  |
| Mono/disaccharides, g                   |                                   |           | 86 ± 47                    |                     | 86 ± 47                                     |                     | 86 ± 48                           |                     |
| Polysaccharides, g                      |                                   |           | 94 ± 44                    |                     | 95 ± 46                                     |                     | 88 ± 36                           |                     |
| Total fiber, g <sup>5</sup>             | ≥30                               | ≥30       | 12.2 ± 6.5                 | 41                  | 12.2 ± 6.5                                  | 41                  | 12.1 ± 6.3                        | 40                  |
| Total fat, g                            |                                   |           | 67.9 ± 28.0                |                     | 68.8 ± 28.4                                 |                     | 62.7 ± 24.2                       |                     |
| Total fat, % of energy <sup>4</sup>     | 30-40                             | 30-40     | 37.3 ± 6.9                 | 107                 | 37.4 ± 7.0                                  | 107                 | 36.4 ± 6.5                        | 104                 |
| Saturated fat, g                        |                                   |           | 25.1 ± 11.6                |                     | 25.5 ± 11.6                                 |                     | 23.2 ± 11.0                       |                     |
| Saturated fat, % of energy <sup>6</sup> | <10                               | <10       | 13.7 ± 3.2                 | 137                 | 13.7 ± 3.1                                  | 137                 | 13.3 ± 3.4                        | 133                 |
| Monounsaturated fat, g                  |                                   |           | 28.4 ± 12.6                |                     | 28.8 ± 12.9                                 |                     | 26.1 ± 10.4                       |                     |
| Polyunsaturated fat, g                  |                                   |           | 8.6 ± 3.7                  |                     | 8.7 ± 3.8                                   |                     | 7.9 ± 3.4                         |                     |
| Cholesterol, mg <sup>4</sup>            | 300                               | 300       | 341 ± 206                  | 114                 | 349 ± 215                                   | 116                 | 288 ± 131                         | 96                  |
| <b>Micronutrients</b>                   |                                   |           |                            |                     |                                             |                     |                                   |                     |
| <b>Vitamins</b>                         |                                   |           |                            |                     |                                             |                     |                                   |                     |
| A, mg-RE <sup>7</sup>                   | 1.0                               | 0.8       | 0.7 ± 0.7                  | 78                  | 0.7 ± 0.7                                   | 78                  | 0.7 ± 0.4                         | 79                  |
| D, µg                                   | 20                                | 20        | 2.4 ± 2.0                  | 12                  | 2.4 ± 2.0                                   | 12                  | 2.4 ± 1.8                         | 12                  |
| <b>Minerals</b>                         |                                   |           |                            |                     |                                             |                     |                                   |                     |
| Calcium (Ca), mg                        | 1000                              | 1000      | 889 ± 467                  | 89                  | 901 ± 474                                   | 90                  | 810 ± 416                         | 81                  |
| Iron (Fe), mg                           | 10 <sup>4</sup>                   | 15        | 9.0 ± 3.5                  | 72                  | 9.1 ± 3.7                                   | 73                  | 8.4 ± 2.7                         | 66                  |
| Phosphorus (P), mg                      | 700                               | 700       | 1227 ± 448                 | 175                 | 1248 ± 462                                  | 178                 | 1093 ± 320                        | 156                 |
| Potassium (K), mg                       | 4000                              | 4000      | 2740 ± 1072                | 68                  | 2759 ± 1080                                 | 68                  | 2618 ± 1019                       | 65                  |
| Sodium (Na), mg <sup>8</sup>            | 1500                              | 1500      | 2844 ± 659                 | 190                 | 2859 ± 656                                  | 190                 | 2747 ± 674                        | 183                 |
| Alcohol, g <sup>9</sup>                 | 20                                | 10        | 5.7 ± 7.7                  | 38                  | 5.7 ± 8.0                                   | 38                  | 5.7 ± 6.0                         | 40                  |

DACH, dietary recommendations for Germany (D), Austria (A) and Switzerland (CH); FFQ, food frequency questionnaire; SCCSS, Swiss Childhood Cancer Survivor Study; SD, standard deviation

<sup>1</sup> DACH recommendations for the general population age 20-50 years, excluding pregnant and lactating females, 2015.

<sup>2</sup> Percentage of mean intake in relation to the DACH recommended intake level \* 100. Recommended intake is estimated on the basis of the age-sex groups of the DACH guidelines, weighted by the age and sex distribution of the study population. For alcohol intake the maximum tolerated dosage was taken.

<sup>3</sup> Depending on physical activity level (PAL, 1.4-1.8) and age.

<sup>4</sup> Federal Food Safety and Veterinary Office FSVO, [www.naehrwertdaten.ch](http://www.naehrwertdaten.ch).

<sup>5</sup> BLV (2009). Kohlenhydrate in unserer Ernährung – Empfehlungen des BLV. [www.blv.admin.ch](http://www.blv.admin.ch).

<sup>6</sup> BLV (2012). Fett in unserer Ernährung – Empfehlung des BLV. [www.blv.admin.ch](http://www.blv.admin.ch), recommendations as a percentage of the daily energy demand and based on a daily energy intake of 2000 kcal.

<sup>7</sup> Total vitamin A = retinol + carotene/12, expressed in µg RAE.

<sup>8</sup> Na intake based on FFQ data was calculated with the equation:  $(8.20 + 0.38*FFQ \text{ in males})/2.54$  and  $(4.55 + 0.67*FFQ \text{ in females})/2.54$ , with 1 g Na = 2.54 g NaCl see Ref 35. Intake based on FFQ data only gives a mean daily intake of  $1.8 \text{ g} \pm 0.7$  for females and  $1.9 \text{ g} \pm 0.8$  for males.

<sup>9</sup> Maximum tolerated dosage.

**Supplementary Table S5.** Sodium (Na) and potassium (K) intake based on food frequency questionnaire (FFQ) data of adult childhood cancer survivors (CCSs) by language region within Switzerland

|                         |     | CCSs                               |                     |                                   |                     |                                           |                     |                                                           |                     |                                                          |                     |
|-------------------------|-----|------------------------------------|---------------------|-----------------------------------|---------------------|-------------------------------------------|---------------------|-----------------------------------------------------------|---------------------|----------------------------------------------------------|---------------------|
| DACH <sup>1</sup>       |     | FFQ participants<br><i>n</i> = 802 |                     |                                   |                     |                                           |                     | Both FFQ and spot<br>urine participants<br><i>n</i> = 111 |                     | FFQ but not spot<br>urine participants<br><i>n</i> = 691 |                     |
|                         |     | Total<br><i>n</i> = 802            |                     | German speaking<br><i>n</i> = 570 |                     | French/Italian speaking<br><i>n</i> = 232 |                     |                                                           |                     |                                                          |                     |
|                         |     | mean ± SD                          | % DACH <sup>2</sup> | mean ± SD                         | % DACH <sup>2</sup> | mean ± SD                                 | % DACH <sup>2</sup> | mean ± SD                                                 | % DACH <sup>2</sup> | mean ± SD                                                | % DACH <sup>2</sup> |
| Na <sup>3</sup> , g     | 1.5 | 2.8 ± 0.7                          | 190                 | 2.9 ± 0.7                         | 190                 | 2.8 ± 0.7                                 | 188                 | 2.7 ± 0.7                                                 | 183                 | 2.9 ± 0.7                                                | 191                 |
| K, g                    | 4.0 | 2.7 ± 1.1                          | 68                  | 2.8 ± 1.1                         | 69                  | 2.6 ± 1.1                                 | 66                  | 2.6 ± 1.0                                                 | 65                  | 2.8 ± 1.1                                                | 69                  |
| Na:K ratio <sup>4</sup> | -   | 1.2 ± 0.5                          | -                   | 1.2 ± 0.5                         | -                   | 1.2 ± 0.6                                 | -                   | 1.2 ± 0.5                                                 | -                   | 1.2 ± 0.5                                                | -                   |

CCS, childhood cancer survivors, DACH, dietary recommendations for Germany (D), Austria (A) and Switzerland (CH); FFQ, food frequency questionnaire, Na, sodium; K, potassium; SD, standard deviation

<sup>1</sup> DACH recommendations for the general population age 20-50 years, excluding pregnant and lactating females, 2015. Recommendations for Na and K are similar for males and females.

<sup>2</sup> Percentage of mean intake in relation to the DACH recommended intake level \* 100. Recommended intake is estimated on the basis of the age-sex groups of the DACH guidelines, weighted by the age and sex distribution of the study population. For alcohol intake the maximum tolerated dosage was taken.

<sup>3</sup> Na intake based on FFQ data was calculated with the equation: (8.20 + 0.38\*FFQ in males)/2.54 and (4.55 + 0.67\*FFQ in females)/2.54, with 1 g Na = 2.54 g NaCl see Ref 35. Intake based on FFQ data only gives a mean daily intake of 1.8 g ± 0.7 for females and 1.9 g ± 0.8 for males.

<sup>4</sup> Na:K ratio was calculated by dividing the sodium intake (g/day) by the potassium intake (g/day).

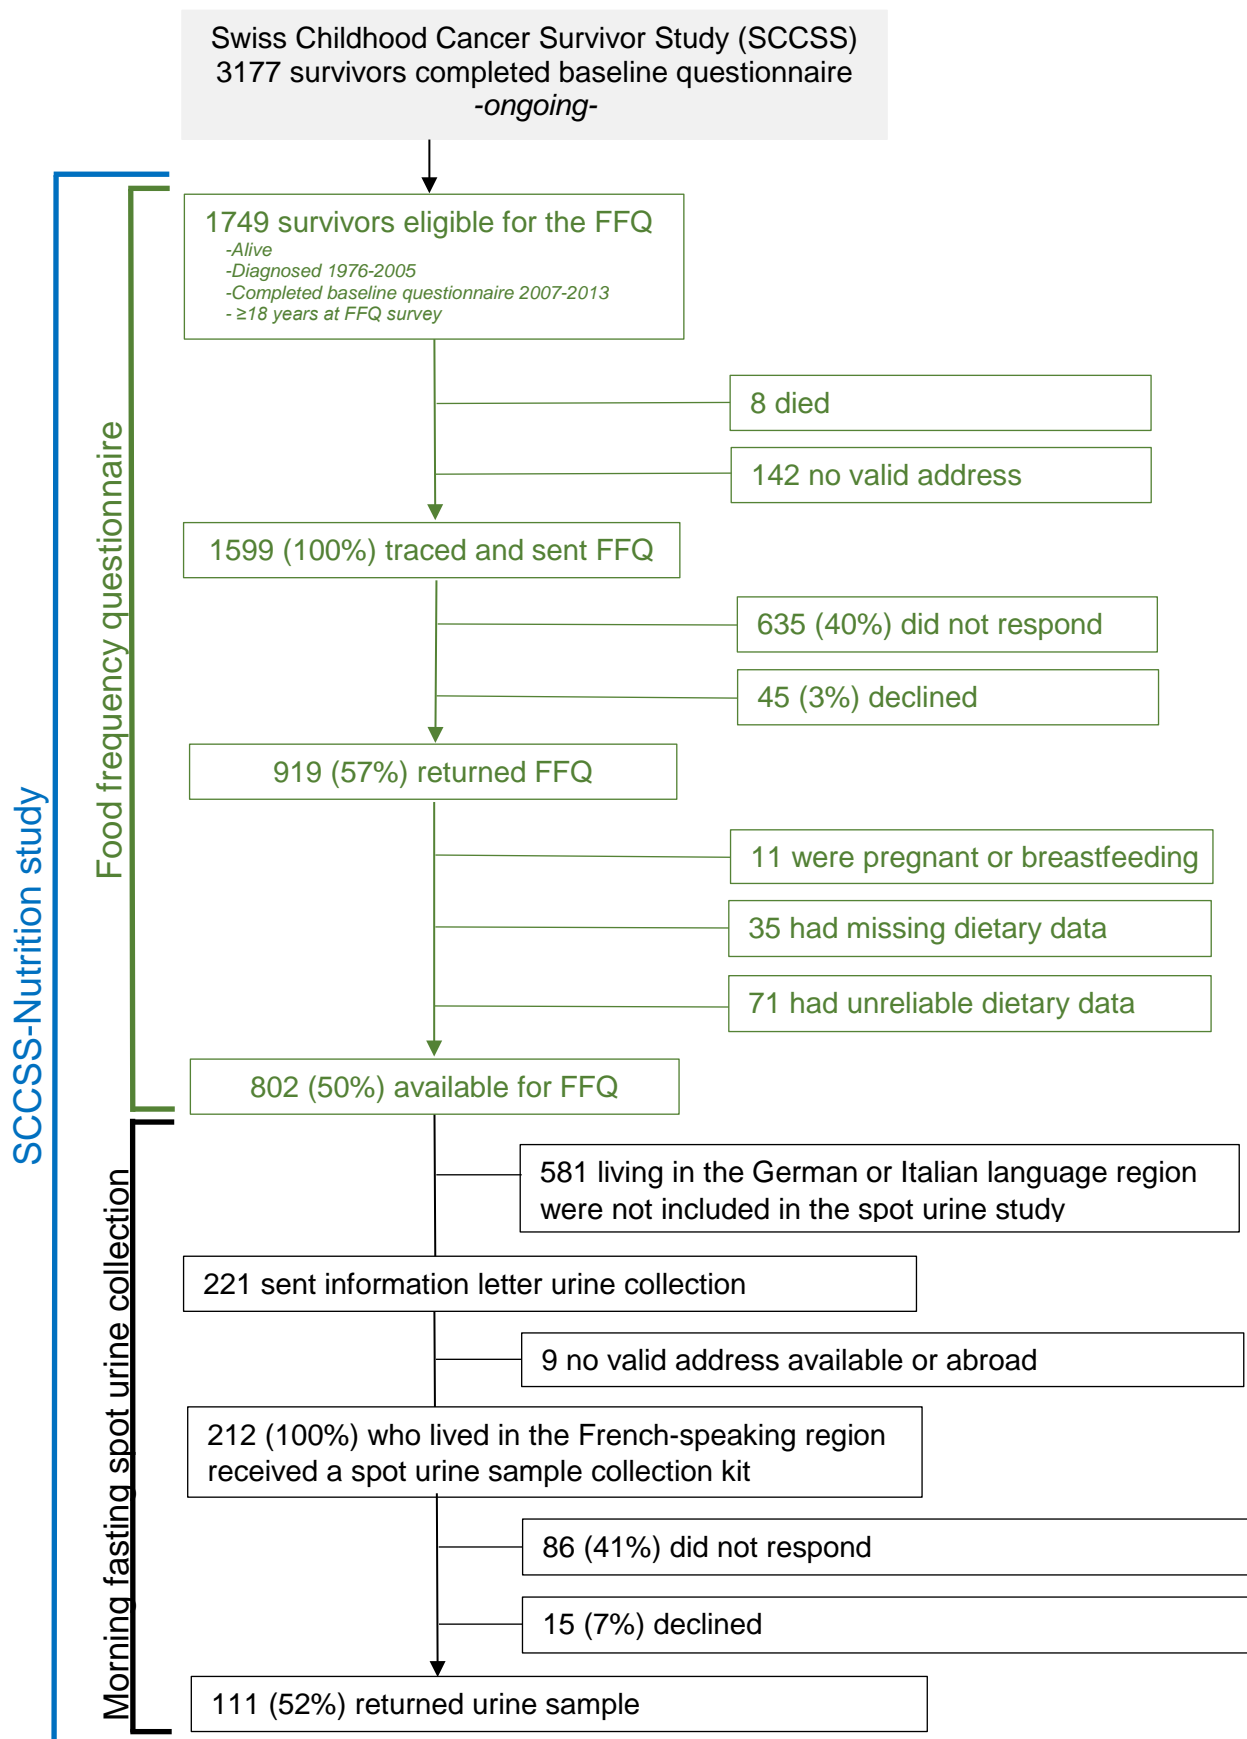

**Figure 1.** Response rates in the Swiss Childhood Cancer Survivor Study (SCCSS)-Nutrition study  
FFQ, food frequency questionnaire

## 24. Système cardiovasculaire

|                                                                                                                                                            | Déjà eu?                 |                          | Quand?<br>_____ (année) | Encore présent?          |                          |
|------------------------------------------------------------------------------------------------------------------------------------------------------------|--------------------------|--------------------------|-------------------------|--------------------------|--------------------------|
|                                                                                                                                                            | Non                      | Oui                      |                         | Non                      | Oui                      |
| Pression artérielle élevée (hypertension à répétition)                                                                                                     | <input type="checkbox"/> | <input type="checkbox"/> | _____ (année)           | <input type="checkbox"/> | <input type="checkbox"/> |
| Irrégularité du rythme cardiaque ou palpitations (arythmie), qui a-ont nécessité une investigation cardiologique                                           | <input type="checkbox"/> | <input type="checkbox"/> | _____ (année)           | <input type="checkbox"/> | <input type="checkbox"/> |
| Insuffisance cardiaque (insuffisance du muscle cardiaque)                                                                                                  | <input type="checkbox"/> | <input type="checkbox"/> | _____ (année)           | <input type="checkbox"/> | <input type="checkbox"/> |
| Maladie coronarienne (angine de poitrine: sensation de pression accompagné de douleurs au niveau de la poitrine à cause d'une moindre oxygénation du cœur) | <input type="checkbox"/> | <input type="checkbox"/> | _____ (année)           | <input type="checkbox"/> | <input type="checkbox"/> |
| Infarctus du myocarde (crise cardiaque)                                                                                                                    | <input type="checkbox"/> | <input type="checkbox"/> | _____ (année)           | <input type="checkbox"/> | <input type="checkbox"/> |
| Thrombose veineuse profonde (p. ex. thrombose d'une jambe)                                                                                                 | <input type="checkbox"/> | <input type="checkbox"/> | _____ (année)           | <input type="checkbox"/> | <input type="checkbox"/> |
| Embolie pulmonaire                                                                                                                                         | <input type="checkbox"/> | <input type="checkbox"/> | _____ (année)           | <input type="checkbox"/> | <input type="checkbox"/> |
| Attaque d'apoplexie (accident cérébrovasculaire etc.)                                                                                                      | <input type="checkbox"/> | <input type="checkbox"/> | _____ (année)           | <input type="checkbox"/> | <input type="checkbox"/> |
| Artériosclérose (Durcissement des artères des jambes, de la carotide ou des artères coronaires)                                                            | <input type="checkbox"/> | <input type="checkbox"/> | _____ (année)           | <input type="checkbox"/> | <input type="checkbox"/> |
| Autres problèmes concernant le système cardiovasculaire<br><b>Si oui</b> , veuillez préciser                                                               | <input type="checkbox"/> | <input type="checkbox"/> | _____ (année)           | <input type="checkbox"/> | <input type="checkbox"/> |

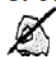

\_\_\_\_\_

\_\_\_\_\_

**Avez-vous eu des opérations du cœur ou du système cardiovasculaire depuis 2007?**

**Si oui**, veuillez indiquer toutes les opérations à la page 9, question 18.

**Supplementary Figure 2A.** Self-reported cardiovascular related medical history questions in French assessed within the Swiss Childhood Cancer Survivor Study (SCCSS)-Nutrition Study



## 24. Herz- und Kreislaufsystem

|                                                                                                                                           | Irgendwann im Leben?     |                          | Seit wann?   | Aktuell noch vorhanden?  |                          |
|-------------------------------------------------------------------------------------------------------------------------------------------|--------------------------|--------------------------|--------------|--------------------------|--------------------------|
|                                                                                                                                           | Nein                     | Ja                       | (Jahr)       | Nein                     | Ja                       |
| Hoher Blutdruck (arterielle Hypertonie, wiederholt gemessen)                                                                              | <input type="checkbox"/> | <input type="checkbox"/> | _____ (Jahr) | <input type="checkbox"/> | <input type="checkbox"/> |
| Herzrhythmusstörungen (Arrhythmien: unregelmässige Herzschläge), welche von einem Kardiologen (Herzspezialisten) abgeklärt werden mussten | <input type="checkbox"/> | <input type="checkbox"/> | _____ (Jahr) | <input type="checkbox"/> | <input type="checkbox"/> |
| Herzinsuffizienz (Herzmuskelschwäche)                                                                                                     | <input type="checkbox"/> | <input type="checkbox"/> | _____ (Jahr) | <input type="checkbox"/> | <input type="checkbox"/> |
| Koronare Herzkrankheit (Angina pectoris: Engegefühl mit Schmerzen in der Brust, das durch einen Sauerstoffmangel im Herzen auftritt)      | <input type="checkbox"/> | <input type="checkbox"/> | _____ (Jahr) | <input type="checkbox"/> | <input type="checkbox"/> |
| Herzinfarkt                                                                                                                               | <input type="checkbox"/> | <input type="checkbox"/> | _____ (Jahr) | <input type="checkbox"/> | <input type="checkbox"/> |
| Tiefe Venenthrombose (Blutgerinnsel z.B. im Bein)                                                                                         | <input type="checkbox"/> | <input type="checkbox"/> | _____ (Jahr) | <input type="checkbox"/> | <input type="checkbox"/> |
| Lungenembolie                                                                                                                             | <input type="checkbox"/> | <input type="checkbox"/> | _____ (Jahr) | <input type="checkbox"/> | <input type="checkbox"/> |
| Schlaganfall (Hirnfarkt oder Hirnblutung)                                                                                                 | <input type="checkbox"/> | <input type="checkbox"/> | _____ (Jahr) | <input type="checkbox"/> | <input type="checkbox"/> |
| Arteriosklerose (Arterienverkalkung der Beine, Halsschlagader oder Herzkranzgefässe)                                                      | <input type="checkbox"/> | <input type="checkbox"/> | _____ (Jahr) | <input type="checkbox"/> | <input type="checkbox"/> |
| Andere Probleme, die das Herz- und Kreislaufsystem betreffen.                                                                             | <input type="checkbox"/> | <input type="checkbox"/> | _____ (Jahr) | <input type="checkbox"/> | <input type="checkbox"/> |
| <b>Falls Ja, bitte beschreiben Sie die Probleme näher:</b>                                                                                |                          |                          |              |                          |                          |
| <br>_____<br>_____                                     |                          |                          |              |                          |                          |

**Wurden Sie seit 2007 am Herzen operiert oder hatten Sie Eingriffe am Herz- oder Kreislaufsystem? Falls Ja, bitte geben Sie alle Operationen auf Seite 9, Frage 18 an.**

**Supplementary Figure 2B.** Self-reported cardiovascular related medical history questions in German assessed within the Swiss Childhood Cancer Survivor Study (SCCSS)-Nutrition Study
